# Supplementary material
Source: publisher site journal article supplement (https://www.dovepress.com/article/344256)
Supplement: Supplementary file 1 [file get_supplementary_file.php]

# Appendix A


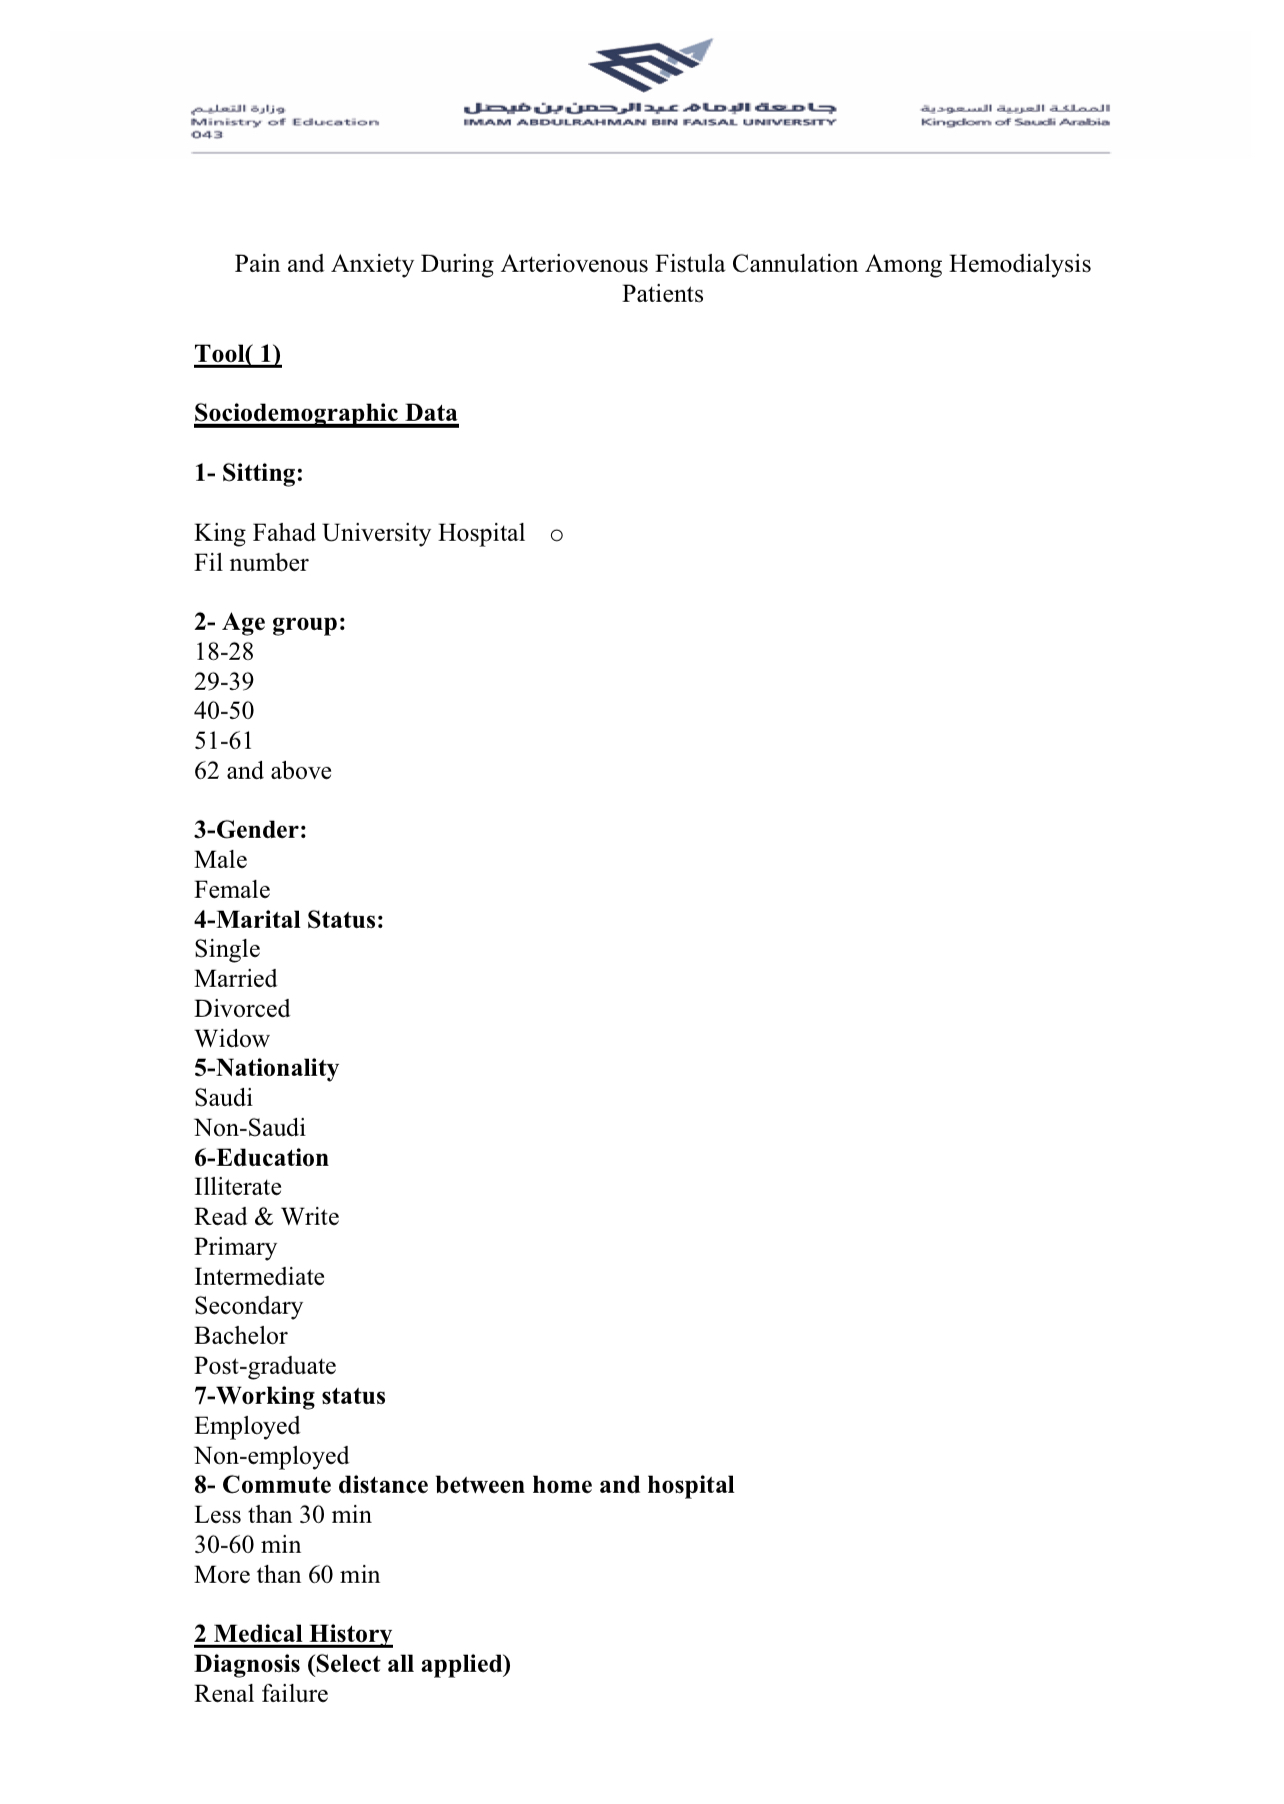


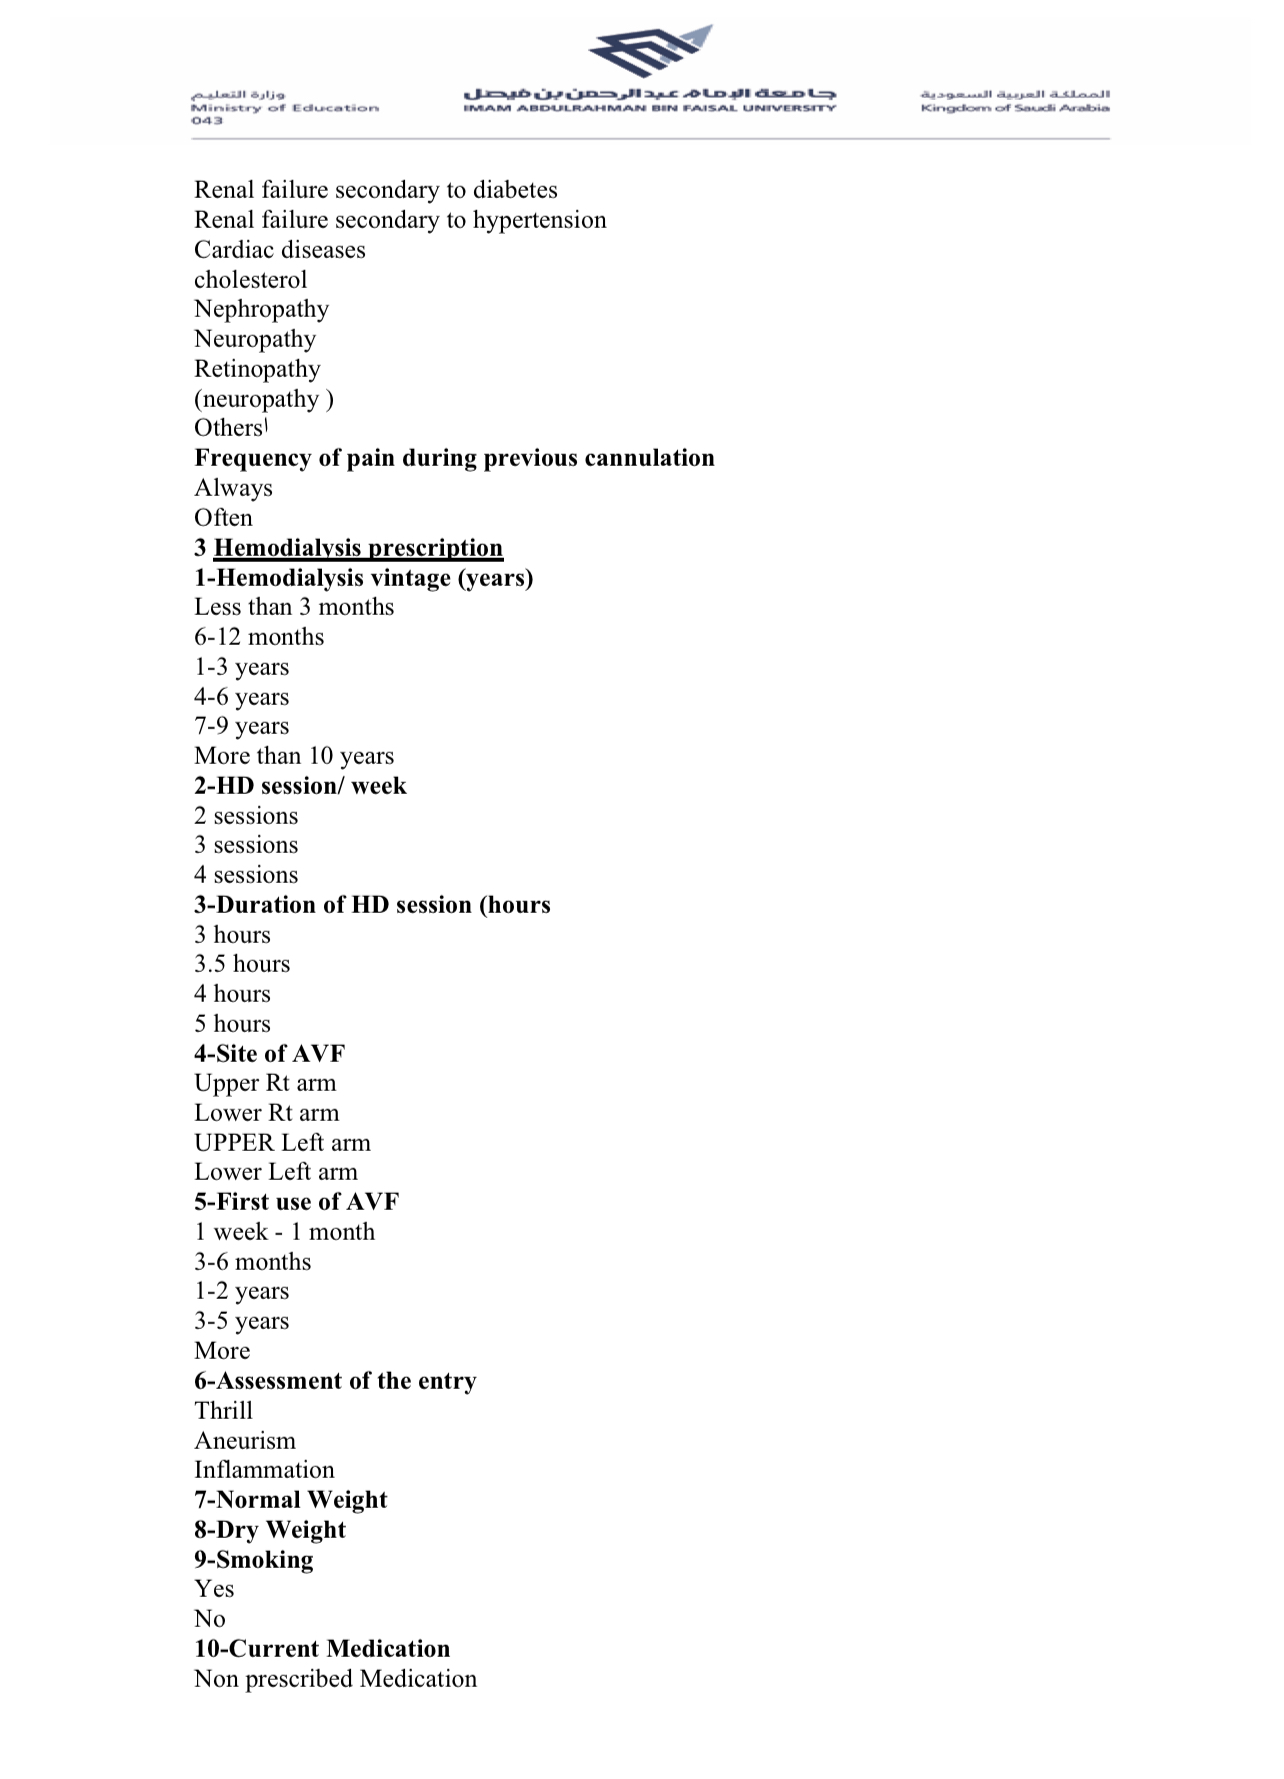


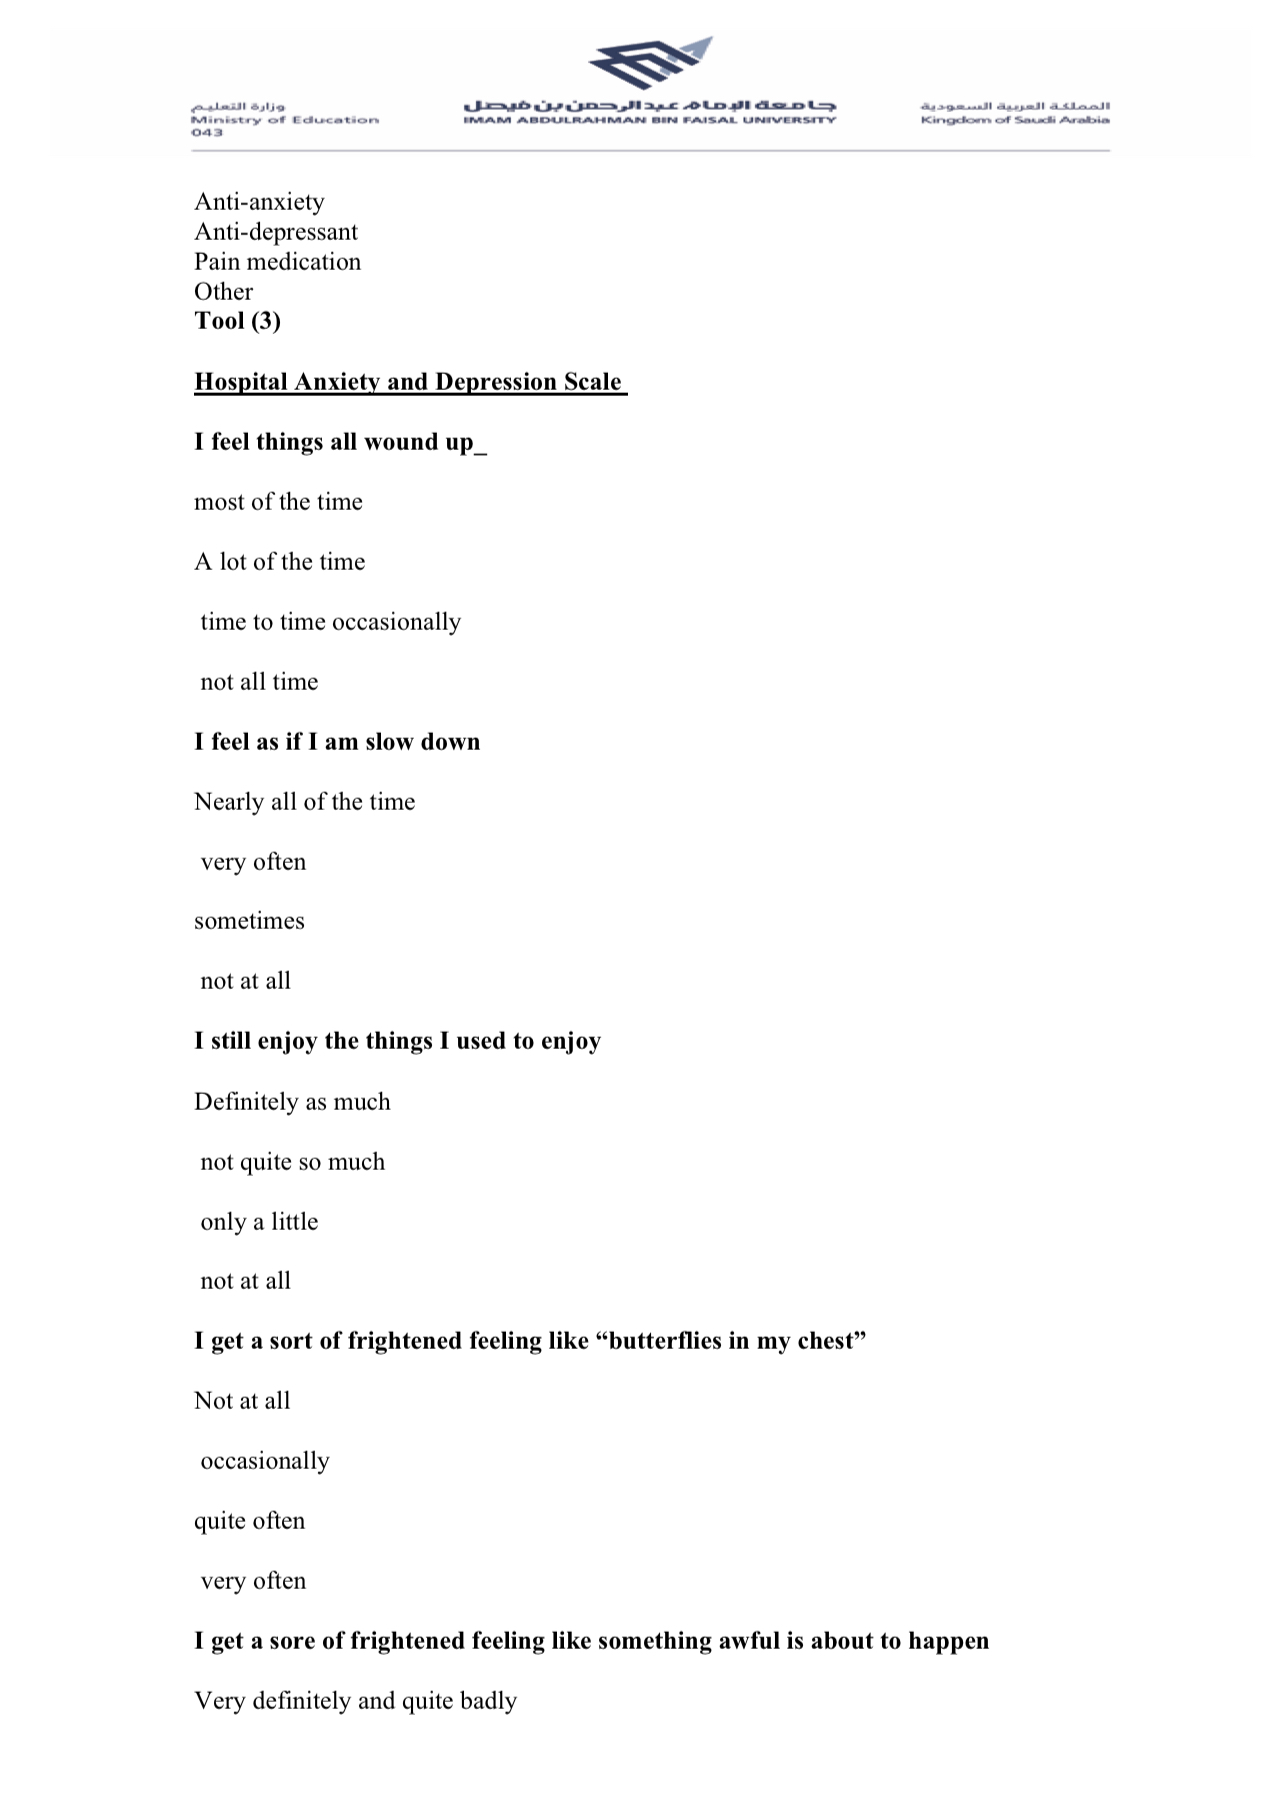


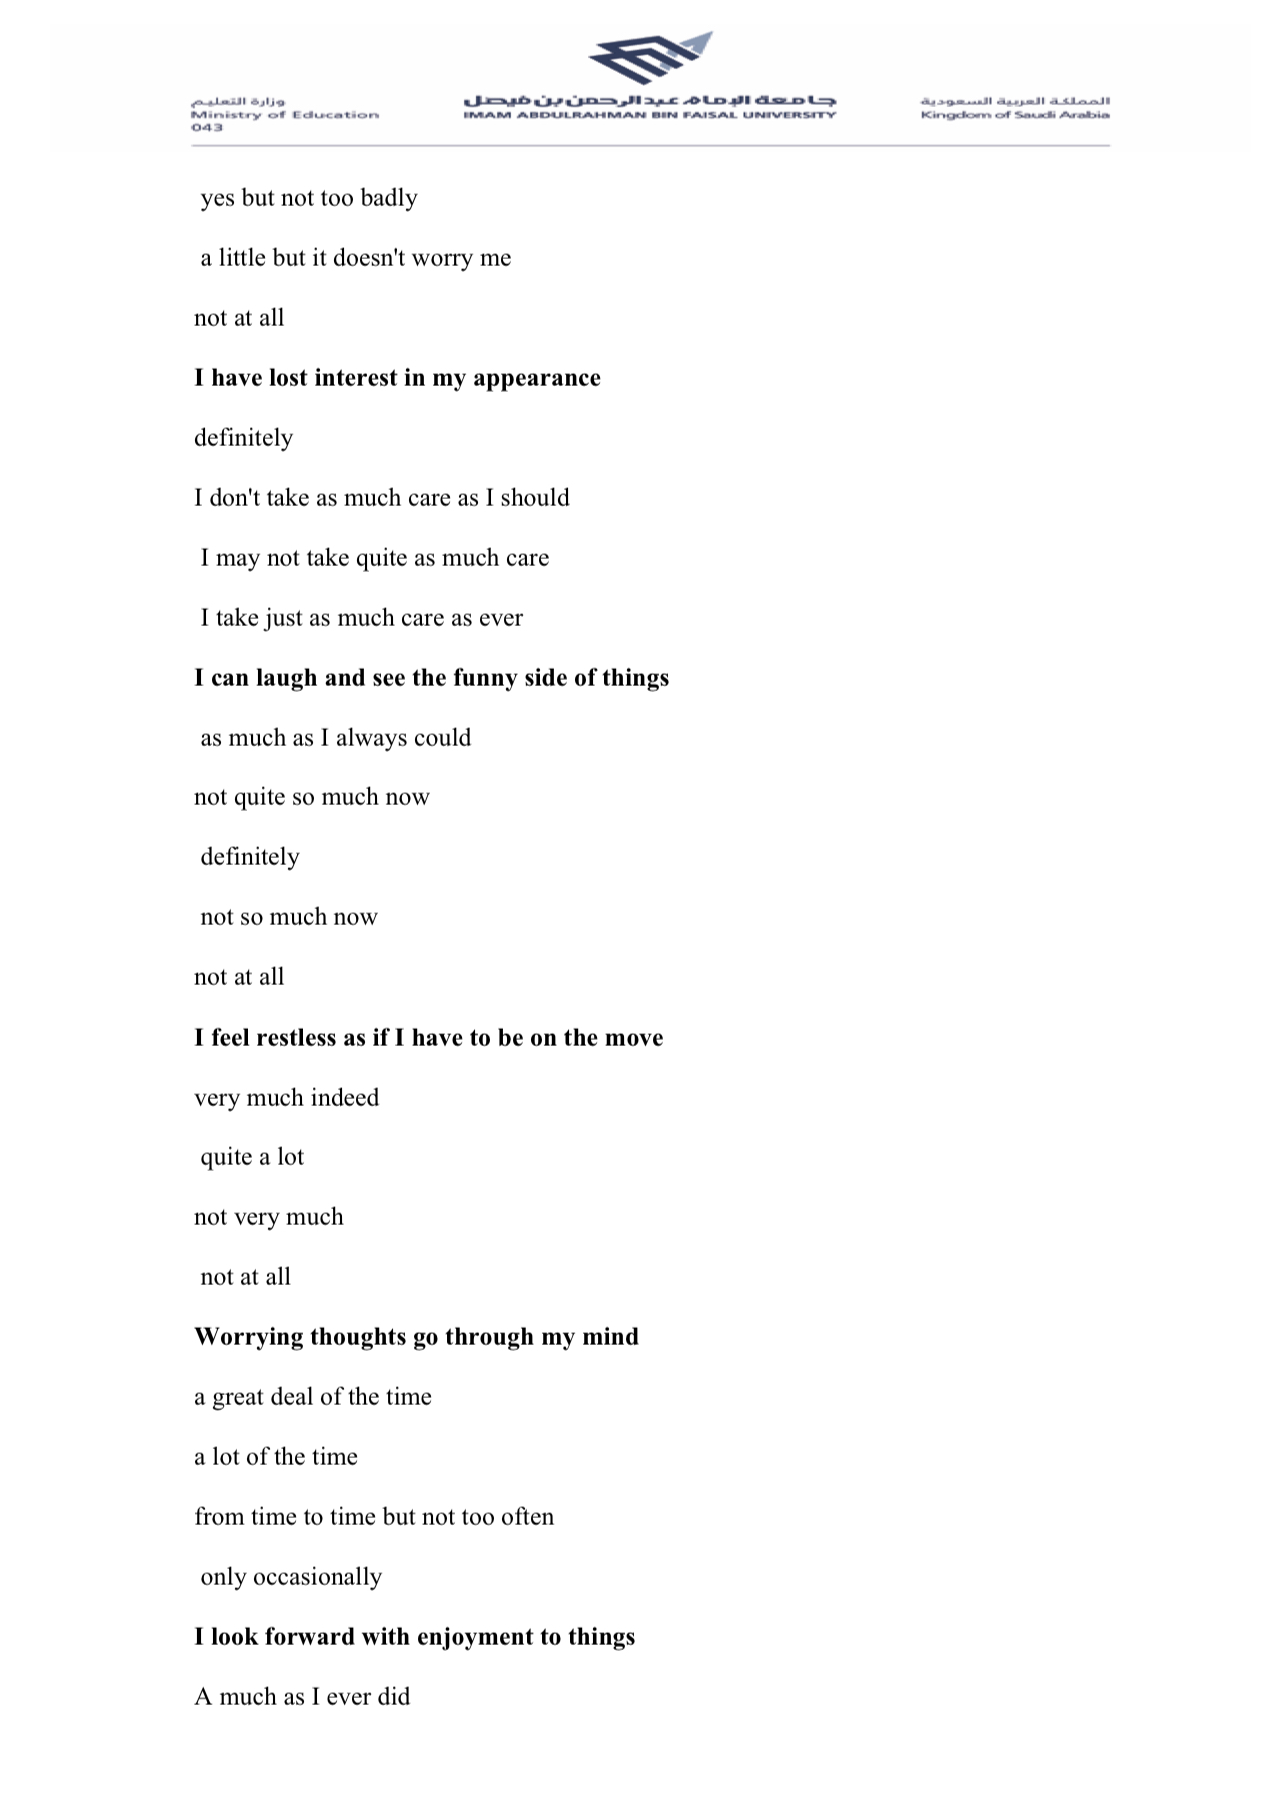


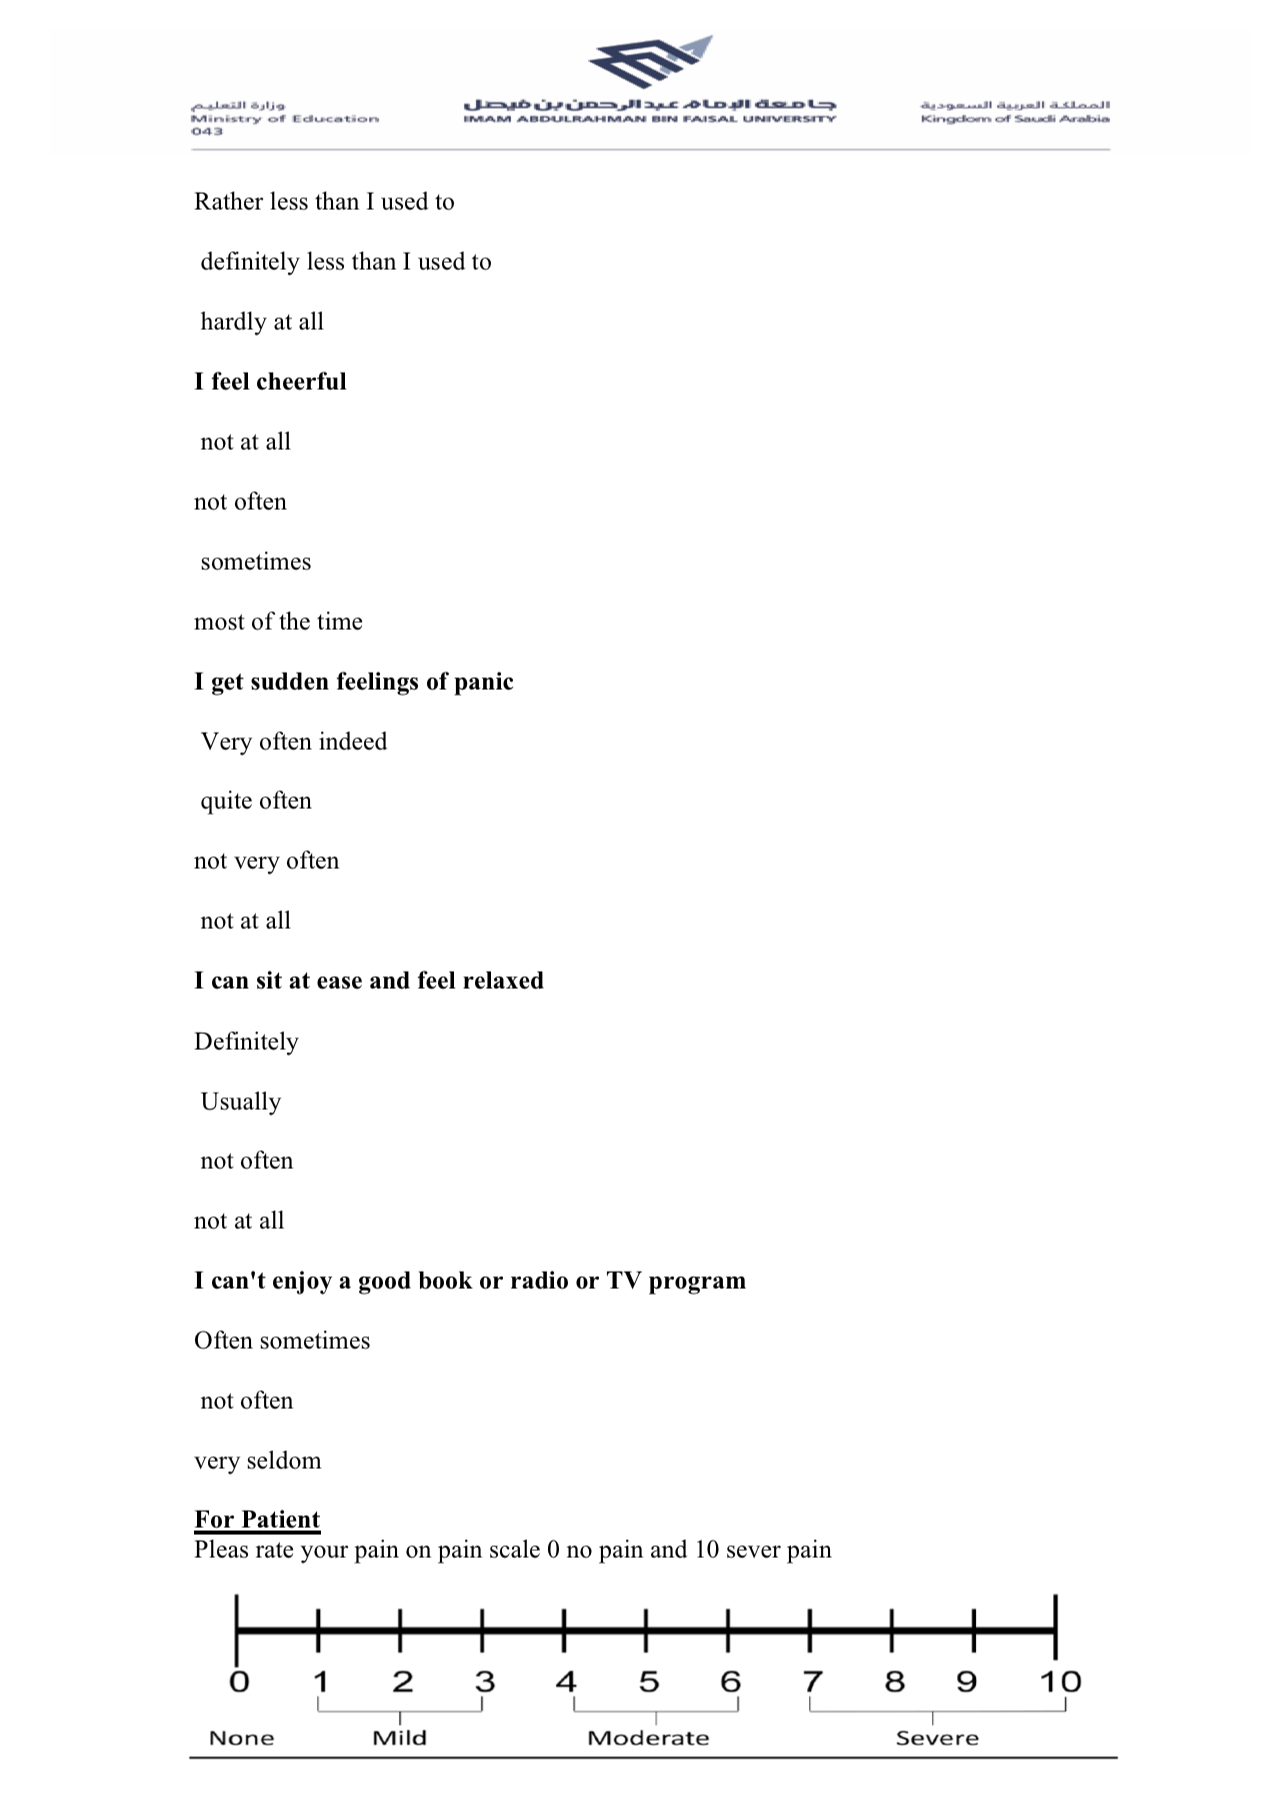


Notes: The Hospital Anxiety and Depression Scale reprinted with permission from: Zigmond AS, Snaith RP. The Hospital Anxiety and Depression Scale. *Acta Psychiatr Scand*. 1983;67(6):361-370. doi:10.1111/j.1600-0447.1983.tb09716.x. © John Wiley & Sons A/S. Published by John Wiley & Sons Ltd.
